# Supplementary material
Source: PubMed Central journal article supplement (PMC4080715)
Supplement: NIHMS446429-supplement-2.pdf [file NIHMS446429-supplement-2.pdf]

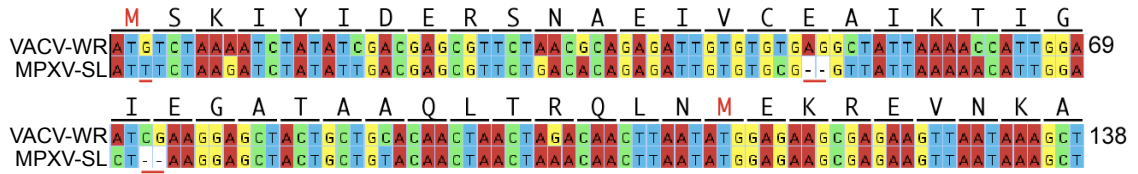

**Supplementary Figure S2.** Mutations in the Z $\alpha$  domain-encoding region of the monkeypox (MPXV) virus E3L ortholog. A sequence alignment of the first 138 nucleotides of VACV K3L with its MPXV ortholog is shown. Deduced amino acids of VACV K3L are shown above the nucleotides. Methionines, encoded by putative start codons, are shown in red. Mutations in the MPXV sequence resulting in disruption of the first start codon and two 2 bp deletions are underlined.
