# Supplementary material
Source: PubMed Central journal article supplement (PMC4080715)
Supplement: NIHMS446429-supplement-4.pdf [file NIHMS446429-supplement-4.pdf]

(a)

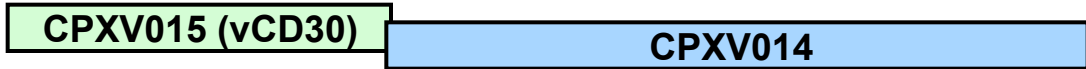

(b)

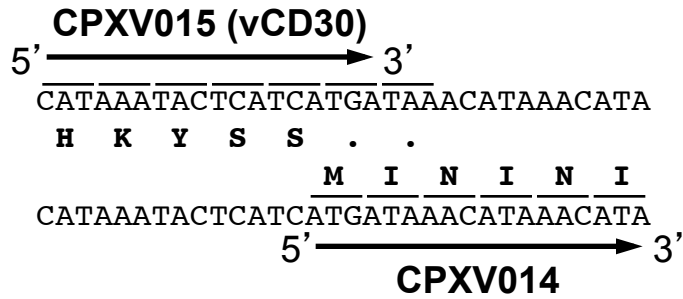

**Supplementary Figure S4.** Genomic organization of CPXV-BR ORFs 015 (vCD30) and 014.

(a) The genomic organization of CPXV-BR ORFs 015 (vCD30) and 014 with respect to the 5' to 3' orientation is shown. (b) The overlapping 3' and 5' regions of ORFs 015 and 014, respectively, and the deduced amino acids are shown.
