# Supplementary material
Source: PubMed Central journal article supplement (PMC4080715)
Supplement: NIHMS446429-supplement-6.pdf [file NIHMS446429-supplement-6.pdf]

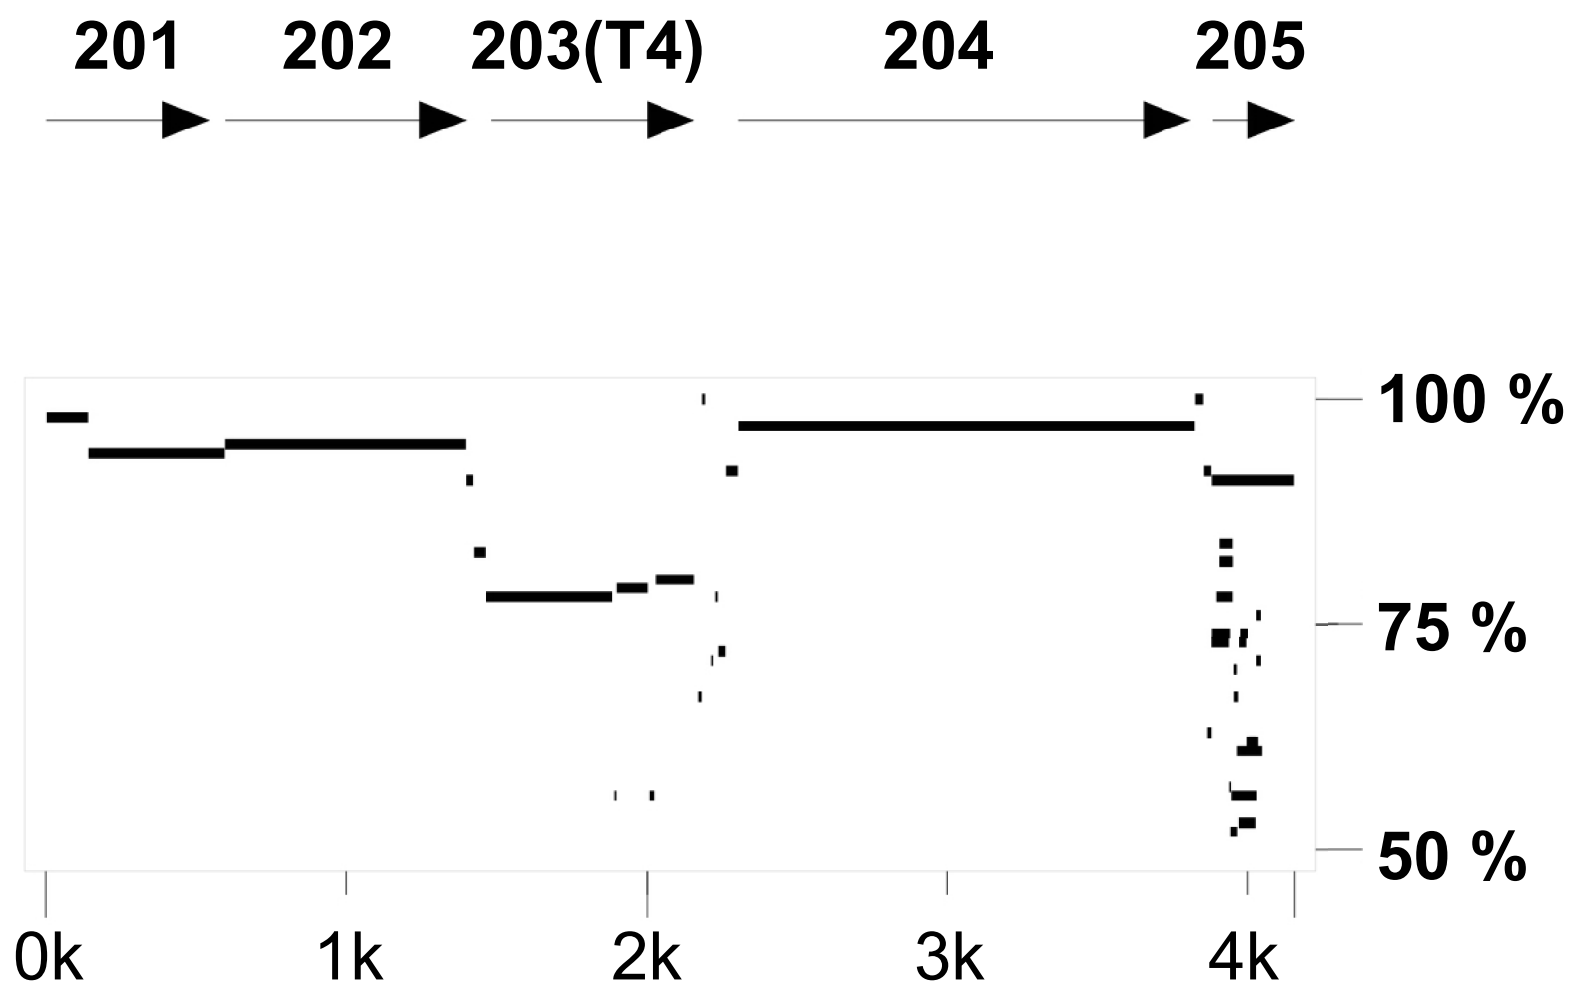

**Supplementary Figure S6.** Sequence identity between the genomic region surrounding ORF203 (T4) in CPXV-BR and CPXV-GRI. Genomic sequences of CPXV-BR and CPXV-GRI were compared using PipMaker (<http://pipmaker.bx.psu.edu/pipmaker>). Levels of sequence identity are shown. Positions of CPXV-BR ORFs (201 to 205) are indicated above. Lower levels of sequence identity in the beginning of ORF 205 are caused by variations in the hexanucleotide repeat (GATACA)<sub>n</sub>.
