# Supplementary material
Source: PubMed Central journal article supplement (PMC4080715)
Supplement: NIHMS446429-supplement-7.pdf [file NIHMS446429-supplement-7.pdf]

| <b>Vaccinia Copenhagen gene</b> | <b>Putative function</b>         |
|---------------------------------|----------------------------------|
| A2L                             | Transcription factor VLTF-3      |
| A3L                             | Viral core protein P4b           |
| A5R                             | RNA-pol subunit 19               |
| A7L                             | VETF subunit                     |
| A10L                            | Viral core protein precursor P4a |
| A11R                            | Involved in morphogenesis        |
| A16L                            | Myristylated membrane protein    |
| A18R                            | DNA helicase                     |
| A24R                            | RNA-pol subunit 132              |
| A29L                            | RNA-pol subunit 35               |
| A32L                            | ATPase                           |
| D5R                             | NTPase                           |
| D6R                             | VETF subunit                     |
| D12L                            | mRNA capping enzyme subunit      |
| E1L                             | Poly-A polymerase subunit        |
| E6R                             | Unknown IMV protein              |
| E9L                             | DNA polymerase                   |
| E10R                            | Sulfhydryl oxidase               |
| F10L                            | Serine/threonine kinase          |
| G5R                             | Involved in membrane formation   |
| G9R                             | Myristylated membrane protein    |
| H2R                             | Unknown IMV protein              |
| H6R                             | DNA topoisomerase type IB        |
| I7L                             | Viral core cysteine proteinase   |
| I8R                             | RNA helicase                     |
| J5L                             | IMV membrane protein             |
| J6R                             | RNA-pol subunit 147              |
| L3L                             | Unknown IMV protein              |

Supplementary Table 1. Details of 28 genes present in single copy in all 104 genomes considered in this study.
